# Supplementary material for: Trends and Disparities in Treatment and Control of Atherosclerotic Cardiovascular Disease in US Adults, 1999 to 2018
Source: PubMed Central journal article supplement — J Am Heart Assoc. 2024 Apr 19;13(9):e032527. doi: 10.1161/JAHA.123.032527 (PMC11179884; doi:10.1161/jaha.123.032527), 2024-04-19

# **SUPPLEMENTAL MATERIAL**

**Table S1. Disease diagnosis from NHANES database.**

| Disease                    | Section                  | English Text                                                                                                                                                                                                                                                                                                                         | Value Description for Diagnosis Yes                                                               |
|----------------------------|--------------------------|--------------------------------------------------------------------------------------------------------------------------------------------------------------------------------------------------------------------------------------------------------------------------------------------------------------------------------------|---------------------------------------------------------------------------------------------------|
| Angina                     | Questionnaire Data       | Has a doctor or other health professional ever told {you/SP} that {you/s/he} . . .had angina (angi-na), also called angina pectoris?                                                                                                                                                                                                 | Yes                                                                                               |
| Heart attack               | Questionnaire Data       | Has a doctor or other health professional ever told {you/SP} that {you/s/he} . . .had a heart attack (also called myocardial infarction (my-o-car-dee-al in-fark-shun))?                                                                                                                                                             | Yes                                                                                               |
|                            | Questionnaire Data       | Has a doctor or other health professional ever told {you/SP} that {you/he/she} had ...?                                                                                                                                                                                                                                              | a heart attack                                                                                    |
| Stroke                     | Questionnaire Data       | Has a doctor or other health professional ever told {you/SP} that {you/s/he} . . .had a stroke?                                                                                                                                                                                                                                      | Yes                                                                                               |
|                            | Questionnaire Data       | Has a doctor or other health professional ever told {you/SP} that {you/he/she} had . . .?                                                                                                                                                                                                                                            | a stroke                                                                                          |
| Coronary disease           | heart Questionnaire Data | Has a doctor or other health professional ever told {you/SP} that {you/s/he} . . .had coronary (kor-o-nare-ee) heart disease?                                                                                                                                                                                                        | Yes                                                                                               |
| Self-reported diabetes     | Questionnaire Data       | {Other than during pregnancy, {have you/has SP}/ {Have you/Has SP}} ever been told by a doctor or health professional that {you have/{he/she/SP} has} diabetes or sugar diabetes?                                                                                                                                                    | Yes                                                                                               |
| Diabetes                   | Laboratory Data          | Glycohemoglobin                                                                                                                                                                                                                                                                                                                      | ≥6.5%                                                                                             |
|                            | Laboratory Data          | Fasting glucose                                                                                                                                                                                                                                                                                                                      | ≥126 mg/dL                                                                                        |
|                            | Questionnaire Data       | The next questions are about specific medical conditions. {Other than during pregnancy, {have you/has SP}/ {Have you/Has SP}} ever been told by a doctor or health professional that {you have/{he/she/SP} has} diabetes or sugar diabetes?                                                                                          | Yes                                                                                               |
|                            | Questionnaire Data       | Use of diabetes medication or insulin, including biguanides (metformin), sulfonylureas, insulin, thiazolidinediones, dipeptidyl peptidase 4 inhibitors, glucose like peptide-1 receptor agonists, sodium-glucose co-transporter-2 inhibitors, alpha-glucosidase inhibitors, meglitinides, amylin analogs, other antidiabetic agents. |                                                                                                   |
| Self-reported hypertension | Questionnaire Data       | {Have you/Has SP} ever been told by a doctor or other health professional that {you/s/he} had hypertension, also called high blood pressure?                                                                                                                                                                                         | Yes                                                                                               |
| Hypertension               | Examination Data         | Average SBP, average DBP (at least 3 times)                                                                                                                                                                                                                                                                                          | Average SBP≥140 mmHg, or average DBP≥90 mmHg.<br>Or average SBP≥130 mmHg, or average DBP≥80 mmHg. |
|                            | Questionnaire Data       | {Have you/Has SP} ever been told by a doctor or other health professional that {you/s/he} had hypertension, also called high blood pressure?                                                                                                                                                                                         | Yes                                                                                               |

Abbreviation: NHANES, National Health and Nutrition Examination Survey; SP: subject participant; SBP: systolic blood pressure; DBP: diastolic blood pressure.

**Table S2. Classification of blood pressure-lowering, lipid-lowering, glucose-lowering, and antiplatelet agents.**

| <b>Category</b>                | <b>Drugs</b>                                                                                                                                                                                                                                                                                                                                                                                                                   |
|--------------------------------|--------------------------------------------------------------------------------------------------------------------------------------------------------------------------------------------------------------------------------------------------------------------------------------------------------------------------------------------------------------------------------------------------------------------------------|
| Blood pressure-lowering agents | <ul style="list-style-type: none"><li>• angiotensin converting enzyme inhibitors</li><li>• angiotensin receptor blockers</li><li>• diuretics</li><li>• calcium channel blockers</li><li>• beta blockers</li><li>• alpha blockers</li><li>• centrally acting agents</li><li>• direct vasodilators</li><li>• aldosterone receptor antagonists</li><li>• renin inhibitors</li><li>• other antihypertensive agents</li></ul>       |
| Glucose-lowering agents        | <ul style="list-style-type: none"><li>• biguanides (metformin)</li><li>• sulfonylureas</li><li>• insulin</li><li>• thiazolidinediones</li><li>• dipeptidyl peptidase 4 inhibitors</li><li>• glucose like peptide-1 receptor agonists</li><li>• sodium-glucose co-transporter-2 inhibitors</li><li>• alpha-glucosidase inhibitors</li><li>• meglitinides</li><li>• amylin analogs</li><li>• other antidiabetic agents</li></ul> |
| Lipid-lowering agents          | <ul style="list-style-type: none"><li>• 3-hydroxy-methylglutaryl coenzyme A reductase inhibitors (statins)</li><li>• ezetimibe</li></ul>                                                                                                                                                                                                                                                                                       |

**Table S3. Weighted prevalence of diagnosed atherosclerotic cardiovascular disease from 1999–2002 to 2015–2018, weighted. (%)**

| <b>Subgroups</b>                   | <b>1999-2000</b>     | <b>2001-2002</b>     | <b>2003-2004</b>     | <b>2005-2006</b>     | <b>2007-2008</b>     | <b>2009-2010</b>     | <b>2011-2012</b>     | <b>2013-2014</b>     | <b>2015-2016</b>     | <b>2017-2018</b>     | <b>p for trend*</b> |
|------------------------------------|----------------------|----------------------|----------------------|----------------------|----------------------|----------------------|----------------------|----------------------|----------------------|----------------------|---------------------|
| <b>Total sample, n<sup>†</sup></b> | 4878                 | 5403                 | 5037                 | 4971                 | 5920                 | 6211                 | 5555                 | 5766                 | 5716                 | 5564                 |                     |
| <b>Total cases, n<sup>†</sup></b>  | 512                  | 585                  | 625                  | 507                  | 635                  | 612                  | 516                  | 534                  | 567                  | 631                  |                     |
| <b>Total</b>                       | 7.3<br>(6.3, 8.4)    | 7.5<br>(6.4, 8.7)    | 8.7<br>(7.0, 10.6)   | 8.0<br>(6.8, 9.3)    | 7.8<br>(6.7, 9.0)    | 7.3<br>(6.2, 8.5)    | 7.5<br>(6.5, 8.6)    | 7.9<br>(7.0, 8.9)    | 7.9<br>(6.9, 9.0)    | 8.9<br>(7.6, 10.4)   | 0.79                |
| <b>Sex</b>                         |                      |                      |                      |                      |                      |                      |                      |                      |                      |                      |                     |
| Male adults                        | 8.6<br>(7.0, 10.5)   | 8.2<br>(6.9, 9.8)    | 9.1<br>(7.1, 11.6)   | 8.6<br>(7.2, 10.2)   | 8.6<br>(7.5, 9.8)    | 8.9<br>(7.5, 10.6)   | 8.4<br>(7.0, 10.2)   | 8.8<br>(7.5, 10.4)   | 9.2<br>(7.9, 10.7)   | 10.6<br>(8.7, 12.9)  | 0.27                |
| Female adults                      | 6.2<br>(5.0, 7.5)    | 6.8<br>(5.5, 8.3)    | 8.3<br>(6.7, 10.2)   | 7.4<br>(5.8, 9.3)    | 7.1<br>(5.6, 8.9)    | 5.8<br>(4.7, 7.1)    | 6.6<br>(5.9, 7.5)    | 7.0<br>(5.5, 8.9)    | 6.6<br>(5.4, 8.1)    | 7.4<br>(5.8, 9.4)    | 0.73                |
| <b>Age groups (years)</b>          |                      |                      |                      |                      |                      |                      |                      |                      |                      |                      |                     |
| 20-44                              | 1.3<br>(0.8, 2.1)    | 1.7<br>(1.2, 2.4)    | 1.4<br>(0.8, 2.5)    | 1.4<br>(0.9, 2.2)    | 1.3<br>(0.8, 2.0)    | 1.2<br>(0.8, 2.0)    | 1.5<br>(1.0, 2.3)    | 1.6<br>(1.1, 2.3)    | 1.4<br>(0.9, 2.1)    | 1.4<br>(1.0, 2.0)    | 0.73                |
| 45-64                              | 9.6<br>(7.9, 11.7)   | 7.8<br>(5.6, 10.8)   | 8.9<br>(6.4, 12.1)   | 7.9<br>(6.3, 9.8)    | 7.6<br>(6.1, 9.4)    | 8.0<br>(6.9, 9.3)    | 6.9<br>(5.8, 8.2)    | 6.7<br>(5.5, 8.2)    | 7.9<br>(6.5, 9.6)    | 9.6<br>(7.3, 12.4)   | 0.62                |
| ≥65                                | 23.7<br>(20.1, 27.7) | 26.6<br>(22.8, 0.7)  | 29.4<br>(24.9, 34.4) | 26.6<br>(24.1, 29.3) | 26.6<br>(22.1, 31.7) | 22.0<br>(18.7, 25.8) | 24.3<br>(22.1, 26.6) | 25.7<br>(22.9, 28.7) | 22.1<br>(18.9, 25.6) | 24.2<br>(21.1, 27.6) | 0.06                |
| <b>Race/Ethnicity*</b>             |                      |                      |                      |                      |                      |                      |                      |                      |                      |                      |                     |
| Non-Hispanic White population      | 8.2<br>(7.0, 9.6)    | 8.3<br>(7.1, 9.8)    | 9.6<br>(7.7, 11.7)   | 8.9<br>(7.5, 10.5)   | 8.6<br>(7.1, 10.4)   | 8.1<br>(6.6, 9.8)    | 8.0<br>(6.9, 9.4)    | 9.1<br>(7.7, 10.7)   | 8.4<br>(7.0, 10.0)   | 10.3<br>(8.5, 12.5)  | 0.13                |
| Hispanic population                | 3.8<br>(3.0, 4.8)    | 3.5<br>(2.5, 4.9)    | 3.6<br>(2.7, 5.0)    | 4.1<br>(3.0, 5.6)    | 4.2<br>(3.4, 5.2)    | 4.5<br>(3.1, 6.4)    | 5.0<br>(3.6, 6.8)    | 4.7<br>(3.7, 6.0)    | 4.8<br>(4.0, 5.8)    | 4.7<br>(3.2, 6.9)    | 0.74                |
| Non-Hispanic Black population      | 6.3<br>(5.0, 7.9)    | 8.1<br>(6.4, 10.2)   | 7.4<br>(5.9, 9.3)    | 7.9<br>(6.3, 9.9)    | 7.7<br>(6.1, 9.7)    | 7.5<br>(6.3, 9.1)    | 7.8<br>(6.6, 9.3)    | 6.6<br>(5.6, 7.8)    | 8.4<br>(6.8, 10.2)   | 7.9<br>(6.5, 9.5)    | 0.46                |
| Other population                   | 6.7<br>(3.4, 12.7)   | 4.3<br>(1.8, 9.9)    | 10.0<br>(5.0, 19.0)  | 4.1<br>(2.1, 8.0)    | 6.7<br>(4.2, 10.6)   | 5.0<br>(2.9, 8.4)    | 7.1<br>(4.6, 11.0)   | 5.5<br>(3.7, 8.0)    | 9.1<br>(5.9, 13.7)   | 8.0<br>(4.7, 13.2)   | 0.35                |
| <b>Education</b>                   |                      |                      |                      |                      |                      |                      |                      |                      |                      |                      |                     |
| <High school                       | 10.3<br>(8.7, 12.1)  | 13.4<br>(11.3, 15.9) | 14.6<br>(11.1, 19.1) | 12.9<br>(11.0, 15.1) | 11.6<br>(10.0, 13.3) | 11.3<br>(8.9, 14.1)  | 11.8<br>(9.2, 15.0)  | 11.6<br>(9.9, 13.6)  | 11.0<br>(9.1, 13.2)  | 12.1<br>(8.1, 17.7)  | 0.21                |

|                                          |                    |                    |                     |                    |                    |                    |                     |                     |                    |                     |      |
|------------------------------------------|--------------------|--------------------|---------------------|--------------------|--------------------|--------------------|---------------------|---------------------|--------------------|---------------------|------|
| High school                              | 8.9<br>(7.4, 10.6) | 7.6<br>(6.1, 9.6)  | 8.7<br>(6.2, 12.1)  | 8.6<br>(5.9, 12.3) | 8.9<br>(6.9, 11.3) | 8.8<br>(7.1, 10.9) | 10.0<br>(7.6, 12.9) | 9.6<br>(8.2, 11.2)  | 9.1<br>(7.3, 11.3) | 10.5<br>(8.1, 13.6) | 0.12 |
| >High school                             | 5.0<br>(3.7, 6.7)  | 5.2<br>(4.3, 6.3)  | 6.6<br>(5.5, 7.9)   | 6.2<br>(5.1, 7.5)  | 5.9<br>(5.1, 6.7)  | 5.4<br>(4.4, 6.6)  | 5.6<br>(4.4, 7.0)   | 6.4<br>(5.3, 7.1)   | 6.8<br>(5.6, 8.2)  | 7.7<br>(6.6, 8.9)   | 0.02 |
| <b>BMI categories (kg/m<sup>2</sup>)</b> |                    |                    |                     |                    |                    |                    |                     |                     |                    |                     |      |
| ≤18.5                                    | 8.4<br>(2.2, 27.1) | 3.4<br>(1.6, 7.2)  | 5.6<br>(1.7, 17.3)  | 6.6<br>(2.1, 18.9) | 5.3<br>(2.4, 11.3) | 5.1<br>(1.7, 13.8) | 7.3<br>(3.2, 15.7)  | 12.4<br>(5.1, 27.5) | 5.3<br>(2.1, 12.5) | 4.3<br>(1.4, 12.6)  | 0.75 |
| 18.5-<25                                 | 4.4<br>(3.6, 5.4)  | 4.2<br>(3.0, 5.9)  | 6.9<br>(5.1, 9.2)   | 4.3<br>(3.2, 5.8)  | 5.8<br>(4.5, 7.5)  | 4.9<br>(3.7, 6.6)  | 5.3<br>(3.9, 7.1)   | 6.0<br>(4.7, 7.8)   | 5.5<br>(4.1, 7.4)  | 5.8<br>(4.7, 7.2)   | 0.36 |
| 25 -<30                                  | 7.4<br>(5.9, 9.4)  | 6.8<br>(5.3, 8.6)  | 8.7<br>(7.2, 10.5)  | 8.8<br>(7.3, 10.5) | 7.4<br>(6.1, 8.8)  | 6.5<br>(5.3, 8.0)  | 6.5<br>(5.1, 8.4)   | 7.7<br>(6.4, 9.3)   | 7.0<br>(5.4, 9.0)  | 9.0<br>(7.0, 11.5)  | 0.66 |
| ≥30                                      | 9.0<br>(7.2, 11.1) | 9.0<br>(7.0, 11.5) | 10.1<br>(7.8, 12.8) | 9.6<br>(7.8, 11.8) | 9.2<br>(7.3, 11.5) | 9.9<br>(8.6, 11.3) | 9.6<br>(8.4, 11.1)  | 8.9<br>(7.6, 10.3)  | 9.8<br>(8.5, 11.3) | 10.1<br>(8.1, 12.6) | 0.99 |
| <b>Insurance</b>                         |                    |                    |                     |                    |                    |                    |                     |                     |                    |                     |      |
| Yes                                      | 8.3<br>(7.2, 9.6)  | 8.4<br>(7.3, 9.7)  | 9.6<br>(7.9, 11.6)  | 8.8<br>(7.8, 10.1) | 8.8<br>(7.5, 10.3) | 8.4<br>(7.1, 9.8)  | 8.5<br>(7.2, 9.9)   | 8.9<br>(7.7, 10.3)  | 8.4<br>(7.1, 9.9)  | 9.6<br>(8.1, 11.2)  | 0.91 |
| No                                       | 2.5<br>(1.5, 4.2)  | 2.6<br>(1.5, 4.6)  | 4.7<br>(3.0, 7.3)   | 4.1<br>(2.6, 6.5)  | 3.3<br>(2.6, 4.3)  | 3.2<br>(2.5, 4.0)  | 3.5<br>(2.5, 4.9)   | 3.4<br>(2.4, 4.9)   | 4.4<br>(2.8, 7.0)  | 5.0<br>(3.5, 7.0)   | 0.13 |

Abbreviation: BMI: body mass index, calculated as weight in kilograms divided by height in meters squared.

Data were presented as weighted percentages with 95% confidence intervals otherwise indicated.

\* The overall trend of risk factor control from 1999 to 2018 were analyzed using logistics regression modeling the survey cycle as a continuous variable.

† Unweighted data.

‡ Race/Ethnicity was determined by self-report in fixed categories. Other race included Asian American, American Indian or Alaskan Native, Native Hawaiian or Pacific Islander, multiple races or ethnicities, or unknown.

**Table S4. Characteristics of US adults with atherosclerotic cardiovascular disease, NHANES 1999-2002 to 2015-2018, weighted. (%)**

|                                          | 1999-2002 (n=1096) | 2003-2006 (n=1129) | 2007-2010 (n=1246) | 2011-2014 (n=1049) | 2015-2018 (n=1197) |
|------------------------------------------|--------------------|--------------------|--------------------|--------------------|--------------------|
| <b>Sex</b>                               |                    |                    |                    |                    |                    |
| Female adults                            | 54.5 (50.1, 58.8)  | 50.9 (46.4, 55.3)  | 55.9 (51.8, 59.9)  | 54.5 (49.8, 59.1)  | 56.4 (52.0, 60.8)  |
| Male adults                              | 45.5 (41.2, 49.9)  | 49.1 (44.7, 53.6)  | 44.1 (40.1, 48.2)  | 45.5 (40.9, 50.2)  | 43.6 (39.2, 48)    |
| <b>Race/Ethnicity<sup>*</sup></b>        |                    |                    |                    |                    |                    |
| Non-Hispanic                             |                    |                    |                    |                    |                    |
| White population                         | 79.6 (75.4, 83.3)  | 79.4 (74.8, 83.4)  | 75.5 (69.9, 80.3)  | 73.7 (69.0, 77.9)  | 70.0 (64.8, 74.7)  |
| Hispanic population                      | 6.8 (4.0, 11.3)    | 5.2 (3.3, 7.9)     | 7.8 (5.1, 11.8)    | 9.3 (6.7, 12.7)    | 8.8 (6.7, 11.4)    |
| Non-Hispanic                             |                    |                    |                    |                    |                    |
| Black population                         | 10.6 (7.9, 13.9)   | 10.5 (8.1, 13.6)   | 11.6 (9.3, 14.4)   | 10.7 (8.0, 14.2)   | 11.0 (8.5, 14.2)   |
| Other population                         | 3.0 (1.6, 5.7)     | 4.9 (3.1, 7.5)     | 5.2 (3.6, 7.4)     | 6.3 (4.7, 8.4)     | 10.2 (7.4, 14.0)   |
| <b>Education</b>                         |                    |                    |                    |                    |                    |
| <High school                             | 35.4 (31.2, 39.8)  | 29.8 (26.0, 34.0)  | 30.0 (26.4, 33.7)  | 24.5 (20.5, 28.9)  | 17.1 (13.8, 21.1)  |
| High school                              | 27.9 (24.1, 32.1)  | 26.5 (22.5, 31.0)  | 28.7 (25.1, 32.6)  | 26.8 (22.9, 31.2)  | 28.3 (24.8, 32.1)  |
| >High school                             | 36.7 (33.1, 40.4)  | 43.6 (38.4, 49.0)  | 41.3 (36.0, 46.9)  | 48.7 (44.3, 53.1)  | 54.5 (49.3, 59.7)  |
| <b>Insurance</b>                         |                    |                    |                    |                    |                    |
| Yes                                      | 93.5 (91.0, 95.3)  | 90.5 (87.5, 92.8)  | 91.1 (89.4, 92.5)  | 91.4 (88.8, 93.4)  | 92.0 (88.7, 94.4)  |
| No                                       | 6.3 (4.4, 8.8)     | 9.5 (7.2, 12.5)    | 8.8 (7.3, 10.5)    | 8.4 (6.4, 11.0)    | 7.8 (5.5, 11.1)    |
| <b>Age groups (years)</b>                |                    |                    |                    |                    |                    |
| 20–44                                    | 10.2 (7.9, 13.0)   | 8.5 (6.2, 11.4)    | 8.0 (5.7, 11)      | 9.2 (7.1, 11.9)    | 7.1 (5.5, 9.1)     |
| 45–64                                    | 35.9 (31.2, 40.8)  | 33.5 (29.1, 38.2)  | 36.8 (33.3, 40.4)  | 32.0 (28.7, 35.5)  | 37.0 (32.4, 41.7)  |
| ≥65                                      | 53.9 (48.7, 59.1)  | 58 (53, 62.9)      | 55.3 (51.6, 58.9)  | 58.8 (54.8, 62.7)  | 56.0 (51.7, 60.2)  |
| <b>Poverty income ratio<sup>†</sup></b>  |                    |                    |                    |                    |                    |
| <1.3                                     | 32.7 (28.5, 37.1)  | 26.0 (21.4, 31.2)  | 27.4 (23.2, 32.1)  | 31.0 (26.7, 35.6)  | 25.0 (21.8, 28.5)  |
| 1.3-<3                                   | 29.3 (25.7, 33.3)  | 39.3 (36.1, 42.6)  | 34.3 (30.0, 38.8)  | 36.3 (32.5, 40.3)  | 34.9 (30.4, 39.6)  |
| ≥3                                       | 38.0 (33.9, 42.3)  | 34.7 (28.9, 41.0)  | 38.3 (33.2, 43.6)  | 32.7 (27.6, 38.3)  | 40.2 (34.7, 45.9)  |
| <b>BMI categories (kg/m<sup>2</sup>)</b> |                    |                    |                    |                    |                    |
| <18.5                                    | 1.8 (0.8, 4.1)     | 1.3 (0.6, 2.7)     | 1.2 (0.6, 2.5)     | 2.0 (1.2, 3.3)     | 0.9 (0.4, 1.7)     |
| 18.5-<25                                 | 21.8 (18.9, 24.9)  | 22.1 (19.1, 25.3)  | 21.8 (19.4, 24.5)  | 21.4 (19.1, 24)    | 18.1 (15.2, 21.3)  |
| 25-<30                                   | 36.6 (31.8, 41.7)  | 36.3 (33.1, 39.6)  | 32.1 (29.4, 35)    | 31.7 (27.7, 36)    | 30.8 (27.7, 34.2)  |
| ≥30                                      | 39.9 (35.2, 44.7)  | 40.4 (36.9, 43.9)  | 44.8 (41.9, 47.7)  | 44.9 (40.4, 49.5)  | 50.2 (45.7, 54.8)  |

Abbreviation: BMI: body mass index, calculated as weight in kilograms divided by height in meters squared. \*Race/Ethnicity was determined by self-report in fixed categories. Other race included Asian American, American Indian or Alaskan Native, Native Hawaiian or Pacific Islander, multiple races or ethnicities, or unknown.† Ratio of family income to the federal poverty threshold in a particular year. A higher poverty income ratio corresponds to a higher level of family income.

**Table S5. Weighted trends in risk factor control among US adults with atherosclerotic cardiovascular disease.**

| Risk factors                       | Inflection point* | P for joinpoint* | 2-year percent change, % (95%CI) <sup>†</sup> |                        |
|------------------------------------|-------------------|------------------|-----------------------------------------------|------------------------|
|                                    |                   |                  | Before inflection point                       | After inflection point |
| LDL-C<70 mg/dL                     | 2005-2006         | 0.42             | 42.5 (-6.9, 459.8)                            | 8.4 (-38.5, 42.9)      |
| LDL-C<100 mg/dL                    | 2005-2006         | 0.01             | 26.8 (11.0, 89.2)                             | 2.0 (-9.8, 5.3)        |
| Non-HDL-C<100 mg/dL                | 2005-2006         | 0.01             | 63.1 (30.2, 190.0)                            | 8.6 (-11.9, 15.3)      |
| Non-HDL-C<130 mg/dL                | 2007-2008         | 0.02             | 20.3 (10.6, 72.7)                             | 1.6 (-11.1, 6.0)       |
| BP<130/80 mmHg                     | 2013-2014         | 0.04             | 5.4 (3.6, 12.0)                               | -9.9 (-18.1, 0.1)      |
| BP<140/90 mmHg                     | 2013-2014         | 0.14             | 3.3 (1.5, 13.2)                               | -6.0 (-14.2, 1.7)      |
| HbA1c<7%                           | 2005-2006         | 0.05             | 1.1 (-0.3, 3.9)                               | -1.6 (-4.2, -1.0)      |
| HbA1c<7% in self-reported diabetes | 2003-2004         | 0.07             | 25.2 (-29.9, 123.5)                           | -3.3 (-8.3, 2.0)       |
| HbA1c<8%                           | 2003-2004         | 0.05             | 2.3 (0.7, 4.0)                                | -0.4 (-1.1, -0.2)      |
| HbA1c<8% in self-reported diabetes | 2003-2004         | 0.09             | 14.2 (3.0, 31.9)                              | -0.5 (-3.6, 0.7)       |
| BMI≥30 kg/m <sup>2</sup>           | 2009-2010         | 0.70             | 4.3 (-0.8, 14.7)                              | 1.5 (-7.2, 6.3)        |
| Current smoker                     | 2013-2014         | 0.91             | 1.6 (-8.7, 28.7)                              | -3.5 (-19, 8.9)        |
| Heavy alcohol consumption          | 2013-2014         | 0.06             | 2.8 (-5.7, 12.0)                              | 40.5 (-30.2, 182.7)    |
| All controlled <sup>†</sup>        | 2005-2006         | 0.02             | 73.8 (35.8, 220.4)                            | 8.1 (-7.6, 15.4)       |

Abbreviation: LDL-C: low density lipoprotein cholesterol; Non-HDL-C: non-high density lipoprotein cholesterol, calculate as total cholesterol minus HDL-C; BP: blood pressure; HbA1c: hemoglobin A1c. BMI: body mass index, calculated as weight in kilograms divided by height in meters squared.

\* Joinpoint regression allowing one joinpoint was used to identify whether a joinpoint occurred and to estimate the percentage change per 2-year cycle with 95% confidence interval before and after the joinpoints, and statistical significance of the joinpoints was tested using the Monte Carlo permutation method.

<sup>†</sup> All controlled was defined as HbA1c<7%, BP<140/90 mmHg, and non-HDL<100 mg/dL.



**Table S6. Weighted trends in medication use among US adults with atherosclerotic cardiovascular disease.**

| Risk factors                                                            | Inflection point* | P<br>joinpoint* | 2-year percent change, % (95%CI)* |                        |
|-------------------------------------------------------------------------|-------------------|-----------------|-----------------------------------|------------------------|
|                                                                         |                   |                 | Before inflection point           | After inflection point |
| <b>≥1 lipid lowering medication (%)</b>                                 | 2011-2012         | 0.005           | 10.0 (7.3, 21.7)                  | -2.8 (-14.2, 3.9)      |
| statin (%)                                                              | 2011-2012         | 0.01            | 10.1 (8.0, 14.8)                  | -1.5 (-10.5, 4.0)      |
| Ezetimibe (%)                                                           | NA                |                 |                                   |                        |
| <b>≥1 Antihypertensive medication</b>                                   | 2013-2014         | 0.38            | 1.1 (-1.0, 5.8)                   | -1.2 (-4.1, 1.5)       |
| ACEI/ARB (%)                                                            | 2005-2006         | 0.003           | 16.6 (8.8, 32.7)                  | 0.0 (-2.9, 2.3)        |
| Beta-blocker (%)                                                        | 2005-2006         | 0.05            | 17.9 (7.0, 47.1)                  | 0.7 (-6.5, 3.5)        |
| CCB (%)                                                                 | 2007-2008         | 0.66            | -5.2 (-14.7, 8.1)                 | -1.1 (-17.9, 11.7)     |
| Diuretics (%)                                                           | 2005-2006         | 0.002           | 8.2 (1.4, 25.2)                   | -5.7 (-10.5, -3.8)     |
| <b>≥1 Antihypertensive medication in self-reported hypertension (%)</b> | 2003-2004         | 0.57            | -1.4 (-4.9, 3.1)                  | 0.8 (-3.4, 4.5)        |
| <b>≥1 Antidiabetic medication (%)</b>                                   | 2007-2008         | 0.23            | 11.5 (6.8, 24.3)                  | 5.9 (1.6, 9.7)         |
| Insulin                                                                 | 2011-2012         | 0.20            | 14.9 (8.9, 46.9)                  | 1.7 (-10.1, 10.9)      |
| Metformin                                                               | 2007-2008         | 0.13            | 22.9 (15.8, 47.6)                 | 9.1 (-1.9, 13.6)       |
| Sulfonylureas                                                           | 2009-2010         | 0.27            | 7.2 (-12.2, 60.1)                 | -3.3 (-20.6, 20.8)     |
| Dipeptidyl peptidase 4 inhibitor                                        | NA                |                 |                                   |                        |
| Thiazolidinedione                                                       | 2003-2004         | 0.005           | 138.6 (47.8, 391.6)               | -20.7 (-36.5, -15.5)   |
| SGLT2 inhibitor or GLP-1                                                | NA                |                 |                                   |                        |
| <b>≥1 Antidiabetic medication in self-reported diabetes (%)</b>         | 2009-2010         | 0.004           | 4.9 (3.3, 10.4)                   | -2.7 (-8.3, -0.7)      |
| Insulin                                                                 | 2011-2012         | 0.20            | 14.9 (8.9, 46.9)                  | 1.7 (-10.1, 10.9)      |
| Metformin                                                               | 2007-2008         | 0.13            | 22.9 (15.8, 47.6)                 | 9.1 (-1.9, 13.6)       |
| Sulfonylureas                                                           | 2009-2010         | 0.27            | 7.2 (-12.2, 60.1)                 | -3.3 (-20.6, 20.8)     |
| Dipeptidyl peptidase 4 inhibitor                                        | NA                |                 |                                   |                        |
| Thiazolidinedione                                                       | 2003-2004         | 0.005           | 138.6 (47.8, 391.6)               | -20.7 (-36.5, -15.5)   |
| SGLT2 inhibitor or GLP-1                                                | NA                |                 |                                   |                        |
| Aspirin among 40 years or older (%)                                     | NA                |                 |                                   |                        |
| Clopidogrel (%)                                                         | 2005-2006         |                 | 83.6 (64.4, 120.1)                | 83.6 (64.4, 120.1)     |
| Prasugrel                                                               | NA                |                 |                                   |                        |

Abbreviation: ACEI: angiotensin-converting enzyme inhibitors; ARB: angiotensin receptor blockers; CCB: calcium channel blockers; GLP-1, glucagon-like peptide-1; SGLT2, sodium-dependent glucose transporters 2.

\*Joinpoint regression allowing one joinpoint was used to identify whether a joinpoint occurred and to estimate the percentage change per 2-year cycle with 95% confidence interval before and after the joinpoints, and statistical significance of the joinpoint was tested using the Monte Carlo permutation method.

**Table S7. Risk factor control and medication use among ASCVD across 1999-2018 (n, weighted percentage[%])**

| Socioeconomic subgroups                                 | Use of statin<br>(n=2897) | Use of<br>antihypertensive<br>agents in self-<br>reported hypertension<br>(n=3642) | Use of antidiabetic<br>agents in self-<br>reported diabetes<br>(n=1435) | All controlled<br>(BP<140/90 mmHg,<br>non-HDL-C<100<br>mg/dl, HbA1C <7%)<br>(n=627) | Non-HDL<100<br>mg/dL<br>(n=1076) | BP<140/90<br>mmHg<br>(n=3269) | HbA1c<7<br>(n=4189) |
|---------------------------------------------------------|---------------------------|------------------------------------------------------------------------------------|-------------------------------------------------------------------------|-------------------------------------------------------------------------------------|----------------------------------|-------------------------------|---------------------|
| <b>Sex</b>                                              |                           |                                                                                    |                                                                         |                                                                                     |                                  |                               |                     |
| Male adults                                             | 1820 (63.3)               | 2020 (90.2)                                                                        | 820 (85.3)                                                              | 443 (17.6)                                                                          | 716 (25.4)                       | 1998 (74.7)                   | 2404 (84.2)         |
| Female adults                                           | 1077 (47.9)               | 1622 (90.2)                                                                        | 615 (80.9)                                                              | 184 (11.6)                                                                          | 360 (20.2)                       | 1271 (64.0)                   | 1785 (88.5)         |
| <b>Race/Ethnicity*</b>                                  |                           |                                                                                    |                                                                         |                                                                                     |                                  |                               |                     |
| Non-Hispanic<br>White population                        | 1737 (59.1)               | 1990 (91.6)                                                                        | 660 (84.6)                                                              | 390 (15.3)                                                                          | 609 (22.5)                       | 1900 (71.1)                   | 2511 (88.0)         |
| Hispanic population<br>Non-Hispanic<br>Black population | 448 (37.8)                | 593 (74.4)                                                                         | 315 (77.3)                                                              | 80 (11.8)                                                                           | 156 (21.0)                       | 581 (69.2)                    | 676 (79.3)          |
| Other population                                        | 503 (43.5)                | 825 (89.3)                                                                         | 352 (83.1)                                                              | 115 (13.3)                                                                          | 226 (24.8)                       | 575 (58.2)                    | 769 (80.7)          |
| Age groups (years)                                      | 209 (69.8)                | 234 (94.2)                                                                         | 108 (83.5)                                                              | 42 (17.9)                                                                           | 85 (5.7)                         | 213 (76.2)                    | 233 (80.6)          |
| 20–44                                                   | 53 (21.9)                 | 101 (70.9)                                                                         | 26 (55.2)                                                               | 43 (19.2)                                                                           | 55 (20.6)                        | 262 (79.8)                    | 292 (91.9)          |
| 45–64                                                   | 827 (56.7)                | 1062 (87.3)                                                                        | 480 (86.6)                                                              | 137 (11.1)                                                                          | 227 (15.6)                       | 1119 (77.8)                   | 1240 (83.2)         |
| ≥65                                                     | 2017 (61.8)               | 2479 (94.3)                                                                        | 929 (83.4)                                                              | 447 (16.8)                                                                          | 794 (28.6)                       | 1888 (63.0)                   | 2657 (87.2)         |
| <b>Education</b>                                        |                           |                                                                                    |                                                                         |                                                                                     |                                  |                               |                     |
| <High school                                            | 962 (48.9)                | 1305 (86.1)                                                                        | 586 (83.7)                                                              | 185 (10.6)                                                                          | 336 (18.7)                       | 1132 (68.0)                   | 1414 (82.9)         |
| High school                                             | 745 (57.9)                | 949 (92.8)                                                                         | 343 (86.9)                                                              | 146 (13.5)                                                                          | 267 (22.2)                       | 816 (68.2)                    | 1053 (84.3)         |
| >High school                                            | 1186 (60.1)               | 1379 (91.5)                                                                        | 501 (81.4)                                                              | 294 (18.3)                                                                          | 471 (26.3)                       | 1315 (72.2)                   | 1711 (89.0)         |
| <b>Insurance</b>                                        |                           |                                                                                    |                                                                         |                                                                                     |                                  |                               |                     |
| Yes                                                     | 2754 (59.1)               | 3429 (92.5)                                                                        | 1333 (84.4)                                                             | 596 (15.6)                                                                          | 1020 (24.0)                      | 2958 (70.0)                   | 3806 (86.4)         |
| No                                                      | 129 (26.1)                | 194 (62.9)                                                                         | 93 (73.1)                                                               | 30 (7.4)                                                                            | 55 (12.9)                        | 301 (69.7)                    | 366 (83.1)          |
| <b>Poverty income ratio</b>                             |                           |                                                                                    |                                                                         |                                                                                     |                                  |                               |                     |
| <1.3                                                    | 840 (43.3)                | 1209 (83.5)                                                                        | 528 (79.2)                                                              | 171 (11.8)                                                                          | 313 (19.4)                       | 1098 (66.3)                   | 1402 (86.0)         |
| 1.3-<3                                                  | 965 (54.8)                | 1208 (91.6)                                                                        | 455 (79.9)                                                              | 219 (14.1)                                                                          | 371 (23.9)                       | 1028 (67.9)                   | 1373 (84.8)         |
| ≥3                                                      | 833 (67.2)                | 877 (95.7)                                                                         | 321 (91.1)                                                              | 195 (17.1)                                                                          | 316 (24.2)                       | 878 (74.8)                    | 1078 (88.2)         |
| <b>BMI categories (kg/m<sup>2</sup>)</b>                |                           |                                                                                    |                                                                         |                                                                                     |                                  |                               |                     |
| <18.5                                                   | 21 (36.1)                 | 32 (83.6)                                                                          | 7 (70.6)                                                                | 12 (30.5)                                                                           | 22 (44.5)                        | 42 (57.8)                     | 64 (95.9)           |
| 18.5-<25                                                | 514 (56.6)                | 621 (82.9)                                                                         | 161 (84.0)                                                              | 150 (20.6)                                                                          | 264 (32.6)                       | 660 (67.5)                    | 952 (93.3)          |

|        |             |             |            |            |            |             |             |
|--------|-------------|-------------|------------|------------|------------|-------------|-------------|
| 25-<30 | 945 (58.8)  | 1060 (88.6) | 353 (82.8) | 230 (15.6) | 346 (21.6) | 1080 (71.5) | 1435 (91.4) |
| ≥30    | 1154 (56.5) | 1531 (91.8) | 764 (83.7) | 211 (11.6) | 397 (19.4) | 1370 (70.9) | 1555 (77.7) |

Abbreviation: BP: blood pressure; non-HDL-C: non-high density lipoprotein cholesterol, calculated as total cholesterol minus HDL-C; HbA1c: hemoglobin A1c; BMI: body mass index, calculated as weight in kilograms divided by height in meters squared.\*Race/Ethnicity was determined by self-report in fixed categories. Other race included Asian American, American Indian or Alaskan Native, Native Hawaiian or Pacific Islander, multiple races or ethnicities, or unknown.

**Figure S1. Weighted prevalence of risk factor control among US adults with atherosclerotic cardiovascular disease, 1999–2000 to 2017–2018.**

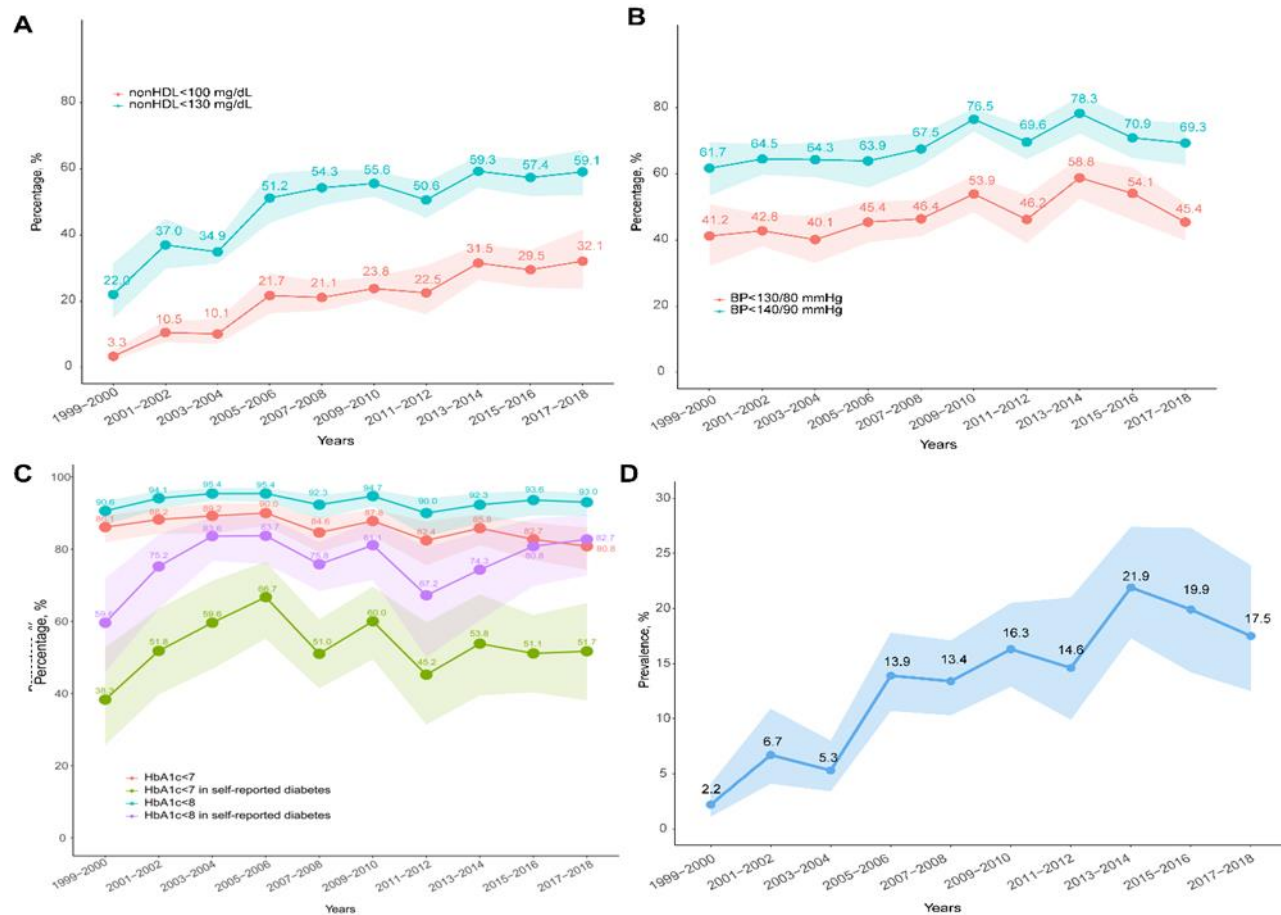

(A) lipid control; (B) blood pressure control; (C) HbA1c control; (D) all risk factor control (HbA1c<7%, blood pressure<140/90mmHg, and non-HDL-C<100 mg/dL).

Abbreviation: non-HDL-C: non-high density lipoprotein cholesterol, calculate as total cholesterol minus high density lipoprotein cholesterol; BP: blood pressure; HbA1c: hemoglobin A1c.

**Figure S2. Weighted trends in average levels of non-HDL-C, blood pressure, and HbA1C among US adults with atherosclerotic cardiovascular disease.**

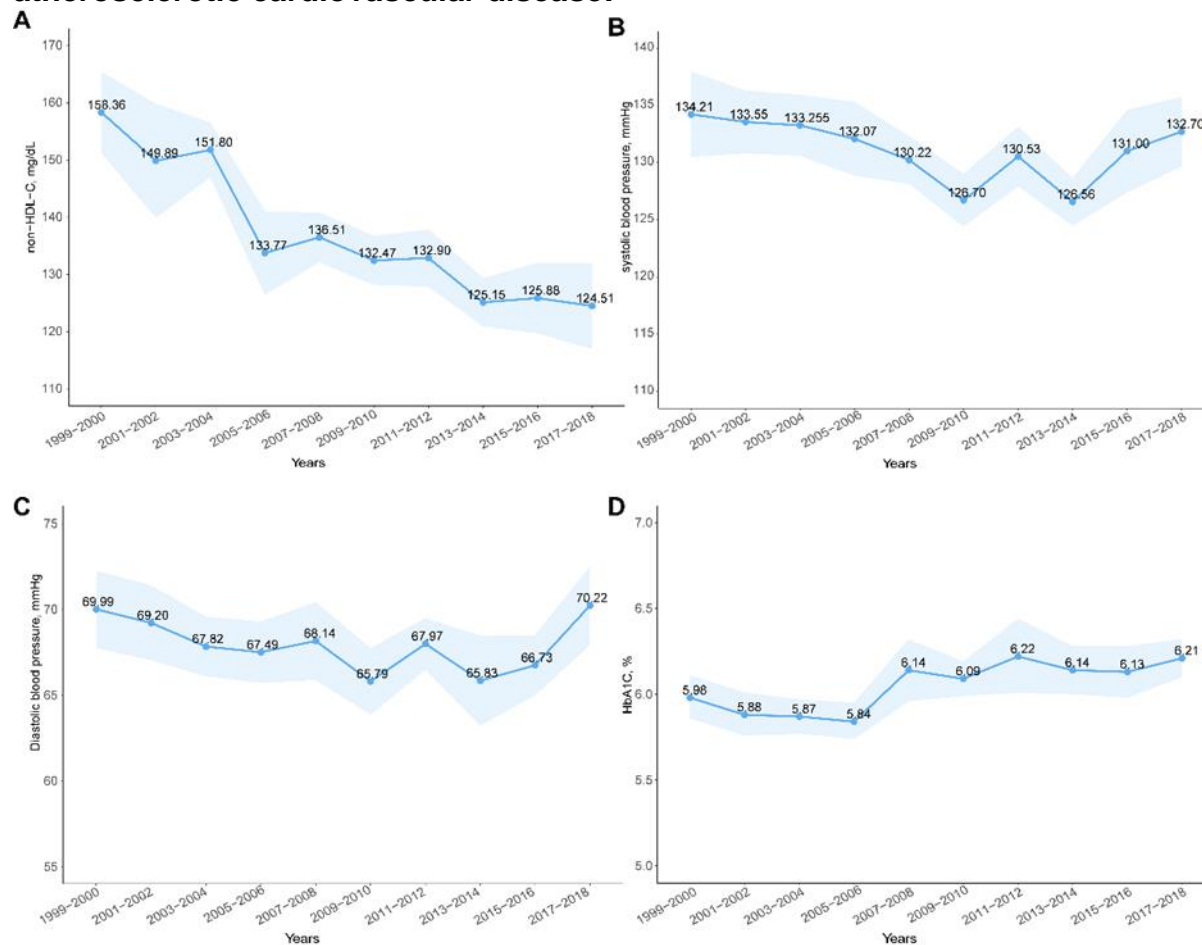

(A) non-HDL-C; (B) systolic blood pressure; (C) diastolic blood pressure; (D) HbA1c.

Abbreviation: Non-HDL-C: non-high density lipoprotein cholesterol, calculated as total cholesterol minus HDL-C; HbA1c: hemoglobin A1c. Shaded areas indicate 95% confidence intervals.

**Figure S3. Weighted prevalence of lifestyle risk factors among US adults with atherosclerotic cardiovascular disease, 1999–2000 to 2017–2018.**

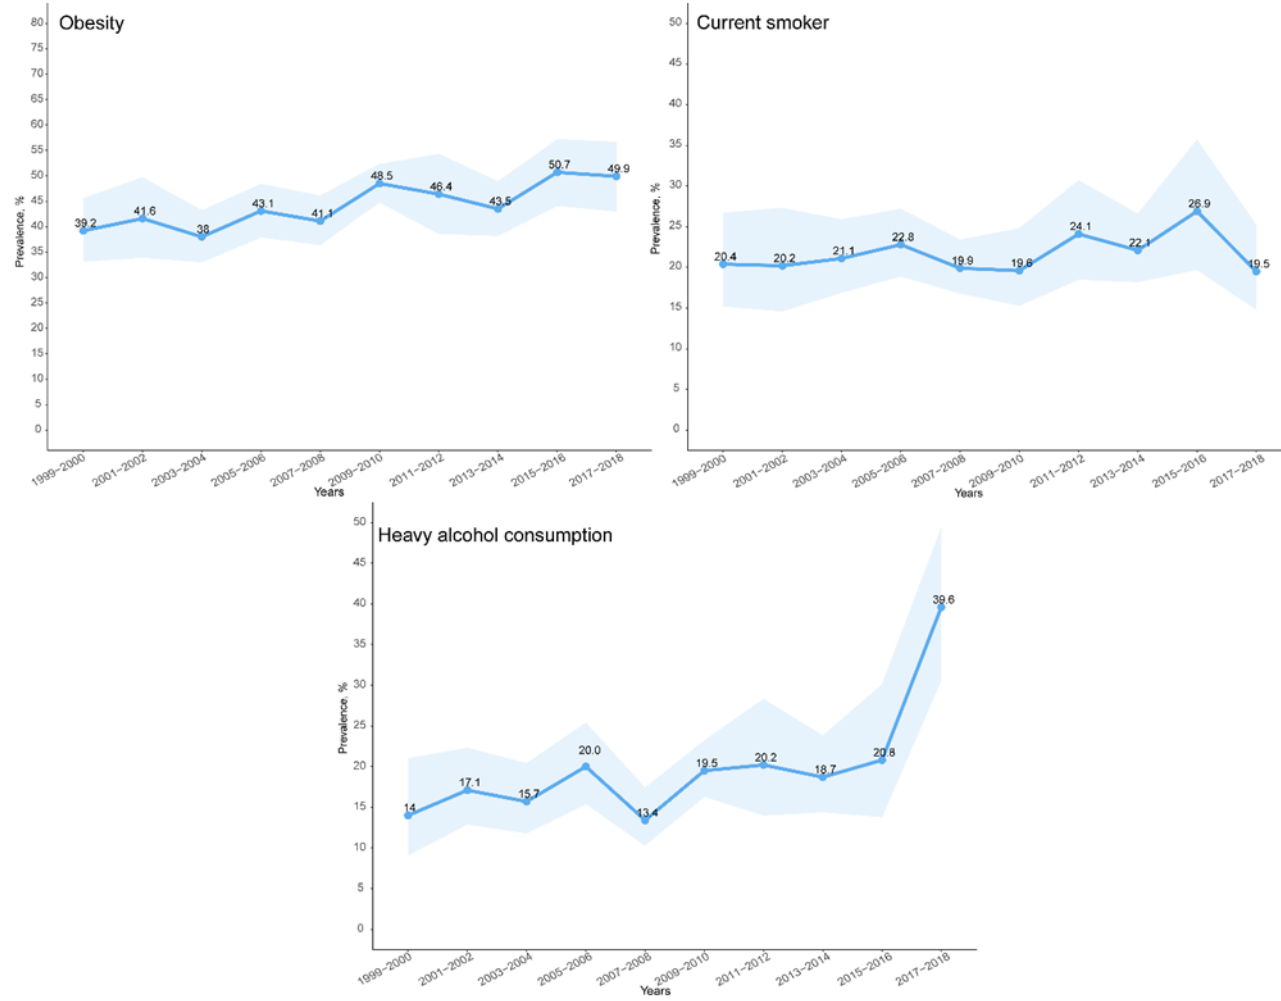

Supplement: JAH3-13-e032527-s001.pdf [file JAH3-13-e032527-s001.pdf]
